# Supplementary material
Source: PubMed Central journal article supplement (PMC2897173)
Supplement: NIHMS167817-supplement-supplement_1.pdf [file NIHMS167817-supplement-supplement_1.pdf]

1  
2  
3 **Table 2:** TDP-43 interacting proteins found in the Nuclear/Splicing cluster. The  
4 references cited here may be found in the Supplementary References.  
5  
6  
7

8  
9  
10 **Table 3:** TDP-43 interacting proteins found in the Cytoplasmic/Translation cluster. The  
11 references cited here may be found in the Supplementary References.  
12  
13  
14

15  
16  
17 **Table 4:** Stress granule proteins found to co-immunoprecipitate with TDP-43.  
18  
19

20  
21  
22 **Supplementary Table 1:** Proteins identified by mass spectrometry that were enriched in  
23 control compared to TDP-43 immunoprecipitation. A pound symbol (#) in the final  
24 column indicates the protein was only present in the control lane.  
25  
26  
27

28  
29  
30  
31 **Supplementary Figure 1:** The image shows the location of bands analyzed by mass  
32 spectrometry.  
33  
34  
35

36  
37  
38 **Supplementary Figure 2: Validation of Interactions in HeLa cells and mouse brain**  
39 **homogenate.** (A) Validation of TDP-43 interaction with hnRNP H and PABPC1 by co-  
40 immunoprecipitation followed by Western blot analysis in HeLa cells. Left panel:  
41 Western blot analysis of whole cell lysates prior to immunoprecipitation was used to  
42 visualize 1% of protein input. Right panel: Western blot analysis of FLAG  
43 immunoprecipitates. (B) Validation of TDP-43 interaction with PABPC1 and hnRNP U  
44 in mouse brain. Left Panel: Western blot analysis of mouse brain lysates prior to  
45  
46  
47  
48  
49  
50  
51  
52  
53  
54  
55  
56  
57  
58  
59  
60

1  
2  
3 immunoprecipitation was used to visualize 1% of protein input. Right Panel: Western  
4  
5 blot analysis of endogenous TDP-43 immunoprecipitates.  
6  
7  
8  
9  
10  
11  
12  
13  
14  
15  
16  
17  
18  
19  
20  
21  
22  
23  
24  
25  
26  
27  
28  
29  
30  
31  
32  
33  
34  
35  
36  
37  
38  
39  
40  
41  
42  
43  
44  
45  
46  
47  
48  
49  
50  
51  
52  
53  
54  
55  
56  
57  
58  
59  
60

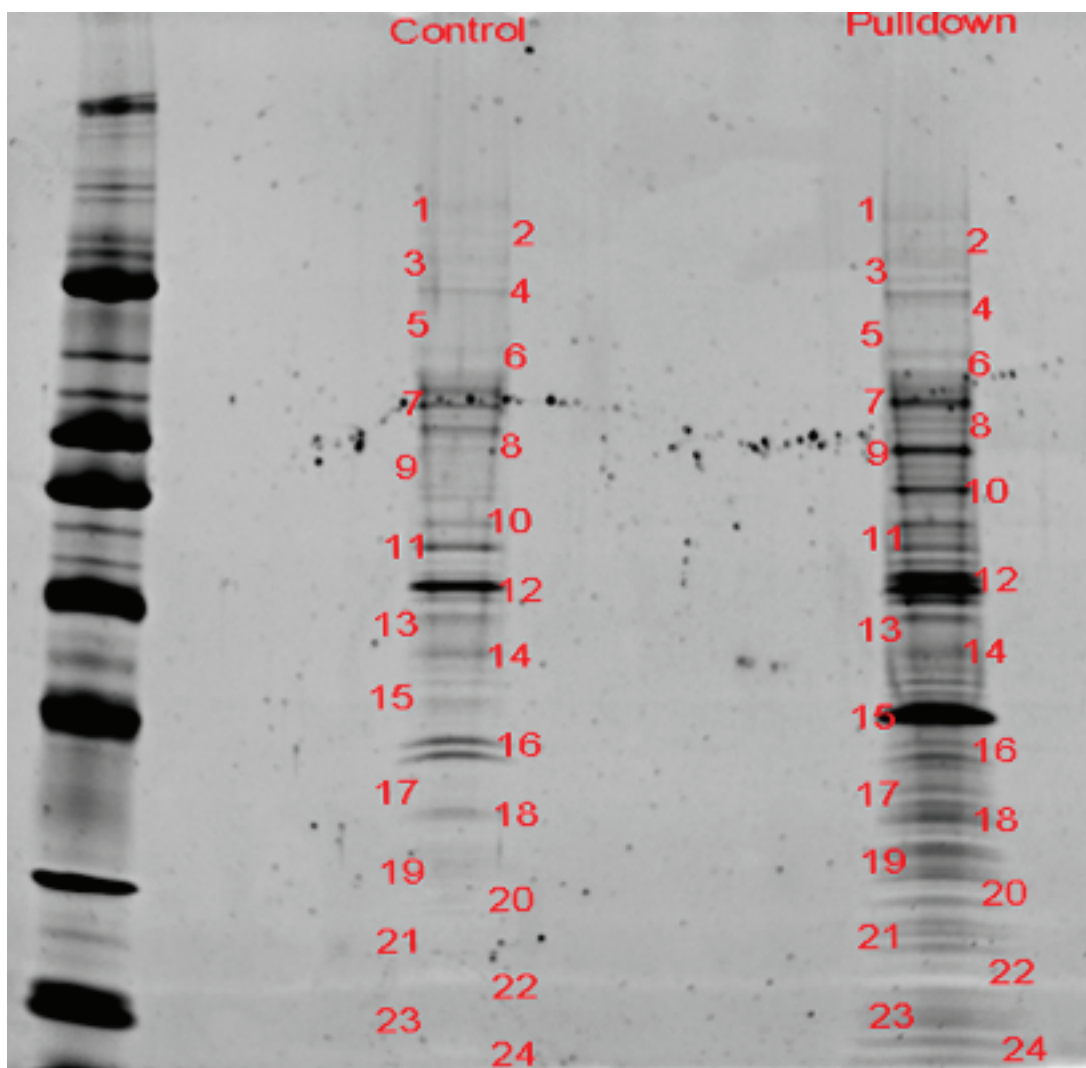

1  
2  
3  
4  
5  
6  
7  
8  
9  
10  
11  
12  
13  
14  
15  
16  
17  
18  
19  
20  
21  
22  
23  
24  
25  
26  
27  
28  
29  
30  
31  
32  
33  
34  
35  
36  
37  
38  
39  
40  
41  
42  
43  
44  
45  
46  
47  
48  
49  
50  
51  
52  
53  
54  
55  
56  
57  
58  
59  
60

**Supplementary Figure 1:** The image shows the location of bands analyzed by mass spectrometry.

**A**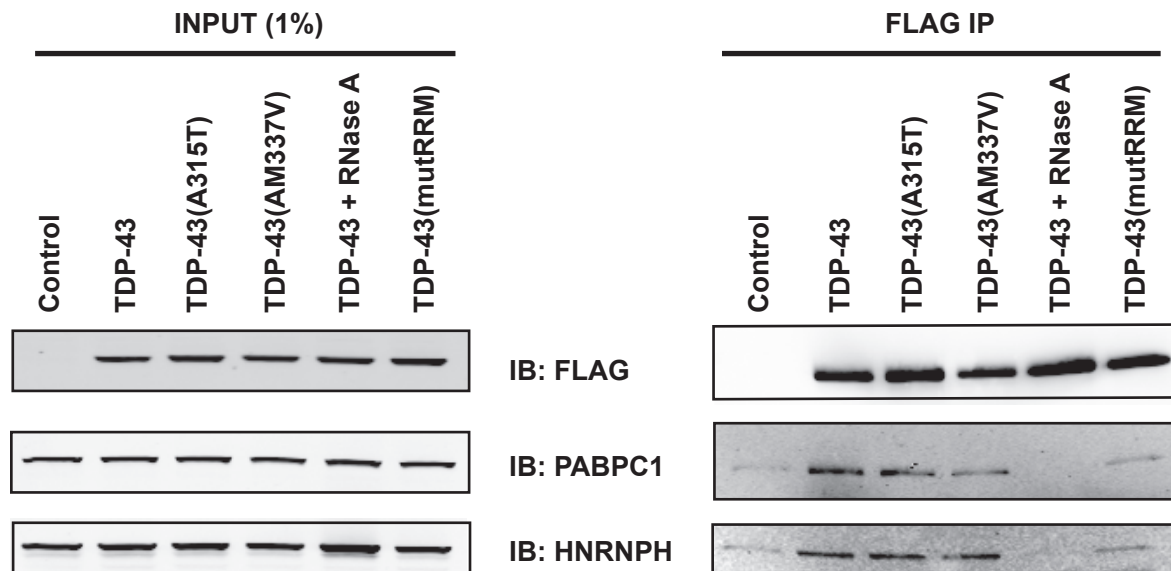**B**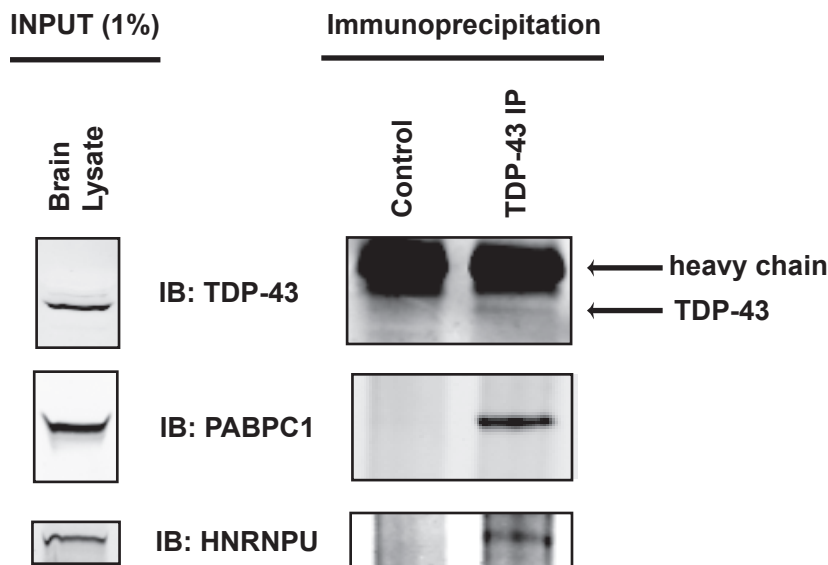

**Supplementary Figure 2: Validation of Interactions in HeLa cells and mouse brain (A)** Validation of TDP-43 interaction with hnRNP H and PABPC1 by co-immunoprecipitation followed by Western blot analysis in HeLa cells. Left panel: Western blot analysis of whole cell lysates prior to immunoprecipitation was used to visualize 1% of protein input. Right panel: Western blot analysis of FLAG immunoprecipitates. **(B)** Validation of TDP-43 interaction with PABPC1 and hnRNP U in mouse brain. Left Panel: Western blot analysis of mouse brain lysates prior to immunoprecipitation was used to visualize 1% of protein input. Right Panel: Western blot analysis of endogenous TDP-43 immunoprecipitates.

1

2

3 **Supplementary Table 1: Proteins enriched in control lane**

4

5

6

7

8

9

10

11

12

13

14

15

16

17

18

19

20

21

22

23

24

25

26

27

28

29

30

31

32

33

34

35

36

37

38

39

40

41

42

43

44

45

46

47

48

49

| Protein Name                                                                       | Symbol    | Molecular Weight (kDa) | Accession Number | Total Spectra: FLAG IP | Unique Peptides: FLAG IP | Percent Coverage: FLAG IP | Total Spectra: Control | Unique Peptides: Control | Percent Coverage: Control | Ratio: IP / Control |
|------------------------------------------------------------------------------------|-----------|------------------------|------------------|------------------------|--------------------------|---------------------------|------------------------|--------------------------|---------------------------|---------------------|
| Kinesin-like protein KIF11                                                         | KIF11     | 119                    | P52732           | 47                     | 24                       | 27                        | 50                     | 30                       | 28                        | 0.9                 |
| Leucine-rich PPR motif-containing protein, mitochondrial                           | LRPPRC    | 158                    | P42704           | 39                     | 23                       | 17                        | 63                     | 43                       | 32                        | 0.6                 |
| Protein arginine N-methyltransferase 5                                             | PRMT5     | 73                     | O14744           | 37                     | 15                       | 27                        | 50                     | 14                       | 22                        | 0.7                 |
| RNA-binding protein 10                                                             | RBM10     | 104                    | P98175           | 36                     | 14                       | 15                        | 41                     | 18                       | 21                        | 0.9                 |
| Actin, cytoplasmic 1                                                               | ACTB      | 42                     | P60709           | 29                     | 12                       | 33                        | 47                     | 10                       | 33                        | 0.6                 |
| Thyroid hormone receptor-associated protein 3                                      | THRAP3    | 109                    | Q9Y2W1           | 21                     | 12                       | 13                        | 52                     | 13                       | 12                        | 0.4                 |
| 26S proteasome non-ATPase regulatory subunit 1                                     | PSMD1     | 106                    | Q99460           | 20                     | 2                        | 2                         | 20                     | 1                        | 1                         | 1.0                 |
| Protein phosphatase 1B                                                             | PPM1B     | 53                     | O75688           | 18                     | 7                        | 17                        | 21                     | 10                       | 27                        | 0.9                 |
| Heat shock protein HSP 90-beta                                                     | HSP90AB1  | 83                     | P08238           | 16                     | 8                        | 13                        | 21                     | 7                        | 11                        | 0.8                 |
| Splicing factor 3B subunit 3                                                       | SF3B3     | 136                    | Q15393           | 15                     | 12                       | 12                        | 23                     | 12                       | 13                        | 0.7                 |
| Glyceraldehyde-3-phosphate dehydrogenase                                           | GAPDH     | 36                     | P04406           | 13                     | 3                        | 14                        | 27                     | 5                        | 24                        | 0.5                 |
| General transcription factor II-I                                                  | GTF2I     | 112                    | P78347           | 11                     | 9                        | 12                        | 13                     | 10                       | 11                        | 0.8                 |
| Histone H2A type 1-B/E                                                             | HIST1H2AB | 14                     | P04908           | 10                     | 3                        | 27                        | 22                     | 1                        | 7                         | 0.5                 |
| Small nuclear ribonucleoprotein-associated proteins B and B'                       | SNRPB     | 25                     | P14678           | 10                     | 3                        | 13                        | 26                     | 6                        | 25                        | 0.4                 |
| 40S ribosomal protein S8                                                           | RPS8      | 24                     | P62241           | 9                      | 5                        | 23                        | 9                      | 3                        | 19                        | 1.0                 |
| Serine/threonine-protein kinase RIO1                                               | RIOK1     | 66                     | Q9BRS2           | 9                      | 5                        | 9                         | 10                     | 6                        | 11                        | 0.9                 |
| Elongation factor 1-alpha 1                                                        | EEF1A1    | 50                     | P68104           | 9                      | 3                        | 7                         | 11                     | 3                        | 6                         | 0.8                 |
| Eukaryotic translation initiation factor 4B                                        | EIF4B     | 69                     | P23588           | 9                      | 4                        | 6                         | 15                     | 6                        | 9                         | 0.6                 |
| Stress-70 protein, mitochondrial                                                   | HSPA9     | 74                     | P38646           | 8                      | 5                        | 9                         | 8                      | 5                        | 10                        | 1.0                 |
| Methylosome protein 50                                                             | WDR77     | 37                     | Q9BQA1           | 8                      | 6                        | 27                        | 11                     | 7                        | 18                        | 0.7                 |
| Replication protein A 70 kDa DNA-binding subunit                                   | RPA1      | 68                     | P27694           | 8                      | 6                        | 7                         | 18                     | 11                       | 17                        | 0.4                 |
| Peroxisiredoxin-1                                                                  | PRDX1     | 22                     | Q06830           | 6                      | 4                        | 20                        | 6                      | 3                        | 16                        | 1.0                 |
| Putative pre-mRNA-splicing factor ATP-dependent RNA helicase DHX15                 | DHX15     | 91                     | O43143           | 6                      | 3                        | 5                         | 6                      | 3                        | 5                         | 1.0                 |
| Histone H4                                                                         | HIST1H4A  | 11                     | P62805           | 6                      | 2                        | 21                        | 7                      | 1                        | 10                        | 0.9                 |
| Protein arginine N-methyltransferase 1                                             | PRMT1     | 42                     | Q99873           | 6                      | 4                        | 9                         | 7                      | 6                        | 17                        | 0.9                 |
| Splicing factor 3B subunit 2                                                       | SF3B2     | 98                     | Q13435           | 6                      | 4                        | 4                         | 11                     | 8                        | 8                         | 0.5                 |
| Bcl-2-associated transcription factor 1                                            | BCLAF1    | 106                    | Q9NYF8           | 6                      | 3                        | 4                         | 19                     | 12                       | 14                        | 0.3                 |
| L-lactate dehydrogenase B chain                                                    | LDHB      | 37                     | P07195           | 5                      | 5                        | 17                        | 7                      | 5                        | 17                        | 0.7                 |
| U4/U6 small nuclear ribonucleoprotein Prp31                                        | PRPF31    | 55                     | Q8WWY3           | 5                      | 3                        | 7                         | 7                      | 4                        | 9                         | 0.7                 |
| L-lactate dehydrogenase A chain                                                    | LDHA      | 37                     | P00338           | 4                      | 2                        | 6                         | 4                      | 2                        | 6                         | 1.0                 |
| Protein unc-84 homolog B                                                           | UNC84B    | 80                     | Q2T9F7           | 4                      | 2                        | 2                         | 4                      | 3                        | 5                         | 1.0                 |
| Calmodulin-regulated spectrin-associated protein 3                                 | KIAA1543  | 135                    | Q9P1Y5           | 4                      | 3                        | 3                         | 5                      | 4                        | 4                         | 0.8                 |
| Peptidyl-prolyl cis-trans isomerase A                                              | PPIA      | 18                     | P62937           | 4                      | 2                        | 12                        | 5                      | 4                        | 19                        | 0.8                 |
| Phosphoribosyl pyrophosphate synthetase-associated protein 2                       | PRPSAP2   | 41                     | O60256           | 4                      | 2                        | 6                         | 5                      | 3                        | 10                        | 0.8                 |
| Histone H2B type 1-D                                                               | HIST1H2BD | 14                     | P58876           | 4                      | 3                        | 24                        | 7                      | 2                        | 19                        | 0.6                 |
| 40S ribosomal protein S15a                                                         | RPS15A    | 15                     | P62244           | 3                      | 1                        | 7                         | 3                      | 2                        | 13                        | 1.0                 |
| ATP synthase subunit beta, mitochondrial                                           | ATP5B     | 57                     | P06576           | 3                      | 2                        | 4                         | 3                      | 2                        | 5                         | 1.0                 |
| Bifunctional methylenetetrahydrofolate dehydrogenase/cyclohydrolase, mitochondrial | MTHFD2    | 38                     | B8ZZU9           | 3                      | 2                        | 7                         | 3                      | 2                        | 7                         | 1.0                 |
| KH domain-containing, RNA-binding, signal transduction-associated protein 1        | KHDRBS1   | 48                     | Q07666           | 3                      | 2                        | 5                         | 3                      | 2                        | 4                         | 1.0                 |

1  
2  
3  
4  
5  
6  
7  
8  
9  
10  
11  
12  
13  
14  
15  
16  
17  
18  
19  
20  
21  
22  
23  
24  
25  
26  
27  
28  
29  
30  
31  
32

| Protein Name                                                 | Symbol   | Molecular Weight (kDa) | Accession Number | Total Spectra: FLAG IP | Unique Peptides: FLAG IP | Percent Coverage: FLAG IP | Total Spectra: Control | Unique Peptides: Control | Percent Coverage: Control | Ratio: IP / Control |
|--------------------------------------------------------------|----------|------------------------|------------------|------------------------|--------------------------|---------------------------|------------------------|--------------------------|---------------------------|---------------------|
| Single-stranded DNA-binding protein, mitochondrial           | SSBP1    | 17                     | Q04837           | 3                      | 1                        | 5                         | 3                      | 2                        | 16                        | 1.0                 |
| Spindlin-1                                                   | SPIN1    | 30                     | Q9Y657           | 3                      | 2                        | 9                         | 3                      | 1                        | 4                         | 1.0                 |
| Splicing factor 3 subunit 1                                  | SF3A1    | 89                     | Q15459           | 3                      | 3                        | 5                         | 3                      | 3                        | 5                         | 1.0                 |
| Pyruvate kinase isozymes M1/M2                               | PKM2     | 58                     | P14618           | 3                      | 2                        | 4                         | 5                      | 3                        | 6                         | 0.6                 |
| Spectrin beta chain, brain 1                                 | SPTBN1   | 275                    | Q01082           | 3                      | 3                        | 2                         | 5                      | 5                        | 2                         | 0.6                 |
| 14-3-3 protein epsilon                                       | YWHAE    | 29                     | P62258           | 2                      | 2                        | 9                         | 2                      | 1                        | 5                         | 1.0                 |
| Ribose-phosphate pyrophosphokinase 1                         | PRPS1    | 35                     | P60891           | 2                      | 2                        | 8                         | 2                      | 1                        | 4                         | 1.0                 |
| Fragile X mental retardation syndrome-related protein 2      | FXR2     | 74                     | P51116           | 2                      | 1                        | 3                         | 4                      | 3                        | 4                         | 0.5                 |
| Heat shock protein HSP 90-alpha                              | HSP90AA1 | 85                     | P07900           | 2                      | 1                        | 2                         | 4                      | 3                        | 5                         | 0.5                 |
| Replication protein A 32 kDa subunit                         | RPA2     | 29                     | P15927           | 2                      | 2                        | 7                         | 4                      | 3                        | 13                        | 0.5                 |
| Serine/threonine-protein kinase 38-like                      | STK38L   | 54                     | Q9Y2H1           | 2                      | 2                        | 5                         | 4                      | 2                        | 6                         | 0.5                 |
| Small nuclear ribonucleoprotein Sm D3                        | SNRPD3   | 14                     | P62318           | 2                      | 1                        | 7                         | 4                      | 2                        | 15                        | 0.5                 |
| Coproporphyrinogen-III oxidase, mitochondrial                | CPOX     | 50                     | P36551           | 2                      | 2                        | 4                         | 5                      | 3                        | 8                         | 0.4                 |
| Splicing factor 3B subunit 1                                 | SF3B1    | 146                    | O75533           | 2                      | 2                        | 2                         | 7                      | 6                        | 5                         | 0.3                 |
| Ribose-phosphate pyrophosphokinase 2                         | PRPS2    | 35                     | P11908           | 2                      | 2                        | 6                         | 9                      | 6                        | 22                        | 0.2                 |
| OTU domain-containing protein 4                              | OTUD4    | 124                    | Q01804           | 2                      | 1                        | 1                         | 21                     | 10                       | 13                        | 0.1                 |
| F-actin-capping protein subunit alpha-1                      | CAPZA1   | 33                     | P52907           | 1                      | 1                        | 5                         | 2                      | 2                        | 11                        | 0.5                 |
| T-complex protein 1 subunit theta                            | CCT8     | 60                     | P50990           | 1                      | 1                        | 2                         | 2                      | 2                        | 4                         | 0.5                 |
| Serine/arginine repetitive matrix protein 2                  | SRRM2    | 300                    | Q9UQ35           | 1                      | 1                        | 1                         | 4                      | 3                        | 1                         | 0.3                 |
| Calcium homeostasis endoplasmic reticulum protein            | CHERP    | 104                    | Q8IWX8           | 1                      | 1                        | 1                         | 6                      | 4                        | 5                         | 0.2                 |
| Protein quaking                                              | QKI      | 38                     | Q96PU8           | 1                      | 1                        | 2                         | 6                      | 3                        | 11                        | 0.2                 |
| Spectrin alpha chain, brain                                  | SPTAN1   | 285                    | Q13813           | 1                      | 1                        | 0                         | 6                      | 6                        | 4                         | 0.2                 |
| 14-3-3 protein zeta/delta                                    | YWHAZ    | 28                     | P63104           | 0                      | 0                        | 0                         | 2                      | 2                        | 11                        | #                   |
| CCR4-NOT transcription complex subunit 1                     | CNOT1    | 267                    | A5YKK6           | 0                      | 0                        | 0                         | 2                      | 2                        | 1                         | #                   |
| Kanadaplin                                                   | SLC4A1AP | 89                     | Q9BWU0           | 0                      | 0                        | 0                         | 2                      | 2                        | 3                         | #                   |
| Phosphoribosyl pyrophosphate synthetase-associated protein 1 | PRPSAP1  | 39                     | Q14558           | 0                      | 0                        | 0                         | 2                      | 2                        | 8                         | #                   |
| RB1-inducible coiled-coil protein 1                          | RB1CC1   | 183                    | Q8TDY2           | 0                      | 0                        | 0                         | 2                      | 2                        | 2                         | #                   |
| Alpha-enolase                                                | ENO1     | 47                     | P06733           | 0                      | 0                        | 0                         | 4                      | 3                        | 6                         | #                   |
| U7 snRNA-associated Sm-like protein LSM11                    | LSM11    | 40                     | P83369           | 0                      | 0                        | 0                         | 5                      | 4                        | 13                        | #                   |

43  
44  
45  
46  
47  
48  
49

**Supplemental References:**

1. Hartman, T. R.; Qian, S.; Bolinger, C.; Fernandez, S.; Schoenberg, D. R.; Boris-Lawrie, K., RNA helicase A is necessary for translation of selected messenger RNAs. *Nat Struct Mol Biol* **2006**, 13, (6), 509-16.
2. Fuller-Pace, F. V., DExD/H box RNA helicases: multifunctional proteins with important roles in transcriptional regulation. *Nucleic Acids Res* **2006**, 34, (15), 4206-15.
3. Kukalev, A.; Nord, Y.; Palmberg, C.; Bergman, T.; Percipalle, P., Actin and hnRNP U cooperate for productive transcription by RNA polymerase II. *Nat Struct Mol Biol* **2005**, 12, (3), 238-44.
4. Yugami, M.; Kabe, Y.; Yamaguchi, Y.; Wada, T.; Handa, H., hnRNP-U enhances the expression of specific genes by stabilizing mRNA. *FEBS Lett* **2007**, 581, (1), 1-7.
5. Choi, Y. D.; Grabowski, P. J.; Sharp, P. A.; Dreyfuss, G., Heterogeneous nuclear ribonucleoproteins: role in RNA splicing. *Science* **1986**, 231, (4745), 1534-9.
6. Shetty, S., Regulation of urokinase receptor mRNA stability by hnRNP C in lung epithelial cells. *Mol Cell Biochem* **2005**, 272, (1-2), 107-18.
7. Jurica, M. S.; Licklider, L. J.; Gygi, S. R.; Grigorieff, N.; Moore, M. J., Purification and characterization of native spliceosomes suitable for three-dimensional structural analysis. *RNA* **2002**, 8, (4), 426-39.
8. Gabler, S.; Schutt, H.; Groitl, P.; Wolf, H.; Shenk, T.; Dobner, T., E1B 55-kilodalton-associated protein: a cellular protein with RNA-binding activity implicated in nucleocytoplasmic transport of adenovirus and cellular mRNAs. *J Virol* **1998**, 72, (10), 7960-71.
9. Zhao, T. T.; Graber, T. E.; Jordan, L. E.; Cloutier, M.; Lewis, S. M.; Goulet, I.; Cote, J.; Holcik, M., hnRNP A1 regulates UV-induced NF-kappaB signalling through destabilization of cIAP1 mRNA. *Cell Death Differ* **2009**, 16, (2), 244-52.
10. Fujimura, K.; Kano, F.; Murata, M., Identification of PCBP2, a facilitator of IRES-mediated translation, as a novel constituent of stress granules and processing bodies. *RNA* **2008**, 14, (3), 425-31.
11. Ma, A. S.; Moran-Jones, K.; Shan, J.; Munro, T. P.; Snee, M. J.; Hoek, K. S.; Smith, R., Heterogeneous nuclear ribonucleoprotein A3, a novel RNA trafficking response element-binding protein. *J Biol Chem* **2002**, 277, (20), 18010-20.
12. Venables, J. P.; Elliott, D. J.; Makarova, O. V.; Makarov, E. M.; Cooke, H. J.; Eperon, I. C., RBMY, a probable human spermatogenesis factor, and other hnRNP G proteins interact with Tra2beta and affect splicing. *Hum Mol Genet* **2000**, 9, (5), 685-94.
13. Oberstrass, F. C.; Auweter, S. D.; Erat, M.; Hargous, Y.; Henning, A.; Wenter, P.; Reymond, L.; Amir-Ahmady, B.; Pitsch, S.; Black, D. L.; Allain, F. H., Structure of PTB bound to RNA: specific binding and implications for splicing regulation. *Science* **2005**, 309, (5743), 2054-7.
14. Cavaloc, Y.; Popielarz, M.; Fuchs, J. P.; Gattoni, R.; Stevenin, J., Characterization and cloning of the human splicing factor 9G8: a novel 35 kDa factor of the serine/arginine protein family. *EMBO J* **1994**, 13, (11), 2639-49.

- 1  
2  
3  
4  
5  
6  
7  
8  
9  
10  
11  
12  
13  
14  
15  
16  
17  
18  
19  
20  
21  
22  
23  
24  
25  
26  
27  
28  
29  
30  
31  
32  
33  
34  
35  
36  
37  
38  
39  
40  
41  
42  
43  
44  
45  
46  
47  
48  
49  
50  
51  
52  
53  
54  
55  
56  
57  
58  
59  
60
15. Chabot, B.; Black, D. L.; LeMaster, D. M.; Steitz, J. A., The 3' splice site of pre-messenger RNA is recognized by a small nuclear ribonucleoprotein. *Science* **1985**, 230, (4732), 1344-9.
  16. Meng, Q.; Rayala, S. K.; Gururaj, A. E.; Talukder, A. H.; O'Malley, B. W.; Kumar, R., Signaling-dependent and coordinated regulation of transcription, splicing, and translation resides in a single coregulator, PCBP1. *Proc Natl Acad Sci U S A* **2007**, 104, (14), 5866-71.
  17. Nagel, R. J.; Lancaster, A. M.; Zahler, A. M., Specific binding of an exonic splicing enhancer by the pre-mRNA splicing factor SRp55. *RNA* **1998**, 4, (1), 11-23.
  18. Kang, Y.; Bogerd, H. P.; Yang, J.; Cullen, B. R., Analysis of the RNA binding specificity of the human tap protein, a constitutive transport element-specific nuclear RNA export factor. *Virology* **1999**, 262, (1), 200-9.
  19. Rossoll, W.; Kroning, A. K.; Ohndorf, U. M.; Steegborn, C.; Jablonka, S.; Sendtner, M., Specific interaction of Smn, the spinal muscular atrophy determining gene product, with hnRNP-R and gry-rbp/hnRNP-Q: a role for Smn in RNA processing in motor axons? *Hum Mol Genet* **2002**, 11, (1), 93-105.
  20. Izaurralde, E.; Lewis, J.; McGuigan, C.; Jankowska, M.; Darzynkiewicz, E.; Mattaj, I. W., A nuclear cap binding protein complex involved in pre-mRNA splicing. *Cell* **1994**, 78, (4), 657-68.
  21. Cheng, H.; Dufu, K.; Lee, C. S.; Hsu, J. L.; Dias, A.; Reed, R., Human mRNA export machinery recruited to the 5' end of mRNA. *Cell* **2006**, 127, (7), 1389-400.
  22. Myer, V. E.; Steitz, J. A., Isolation and characterization of a novel, low abundance hnRNP protein: A0. *RNA* **1995**, 1, (2), 171-82.
  23. Blencowe, B. J.; Issner, R.; Nickerson, J. A.; Sharp, P. A., A coactivator of pre-mRNA splicing. *Genes Dev* **1998**, 12, (7), 996-1009.
  24. Kenmochi, N.; Kawaguchi, T.; Rozen, S.; Davis, E.; Goodman, N.; Hudson, T. J.; Tanaka, T.; Page, D. C., A map of 75 human ribosomal protein genes. *Genome Res* **1998**, 8, (5), 509-23.
  25. Gradi, A.; Imataka, H.; Svitkin, Y. V.; Rom, E.; Raught, B.; Morino, S.; Sonenberg, N., A novel functional human eukaryotic translation initiation factor 4G. *Mol Cell Biol* **1998**, 18, (1), 334-42.
  26. Proud, C. G., Peptide-chain elongation in eukaryotes. *Mol Biol Rep* **1994**, 19, (3), 161-70.
  27. Asano, K.; Phan, L.; Valasek, L.; Schoenfeld, L. W.; Shalev, A.; Clayton, J.; Nielsen, K.; Donahue, T. F.; Hinnebusch, A. G., A multifactor complex of eIF1, eIF2, eIF3, eIF5, and tRNA(i)Met promotes initiation complex assembly and couples GTP hydrolysis to AUG recognition. *Cold Spring Harb Symp Quant Biol* **2001**, 66, 403-15.
